# Supplementary material
Source: PubMed Central journal article supplement (PMC4266192)
Supplement: EBO-10-2014-229-s001.pdf [file EBO-10-2014-229-s001.pdf]

**Supplementary Table 1. Major pathogenic virulence factors and its corresponding genes and functions used in the comparative analysis against *Sphingomonas spp.***

| <b>Genus</b>         | <b>Major Tested Virulence factors</b>                                                                                                                                                  | <b>Corresponding tested Genes or function</b>                                                                                                                                                                                                                                                                                                                                                                                                                                                                                                                                                                                                                                                                                                                                                                              |
|----------------------|----------------------------------------------------------------------------------------------------------------------------------------------------------------------------------------|----------------------------------------------------------------------------------------------------------------------------------------------------------------------------------------------------------------------------------------------------------------------------------------------------------------------------------------------------------------------------------------------------------------------------------------------------------------------------------------------------------------------------------------------------------------------------------------------------------------------------------------------------------------------------------------------------------------------------------------------------------------------------------------------------------------------------|
| <i>Brucella</i>      | Immune-evasion<br>Intracellular survival<br><br>Regulation<br>Secretion system                                                                                                         | Btp1/TcpB (Toll-interleukin-1 receptor (TIR) domain)<br>Cyclic $\beta$ -1,2-glucan synthase (Cgs), gmd; manA; manC; per; pgm; pmm/manB; wbkA; wbkB; wbkC; wzm; wzt; and RicA (Rab2 interacting conserved protein A)<br>BvrR-BvrS two-component system<br>BMEII0025; BMEII0026; BMEII0027; BMEII0028; BMEII0029; BMEII0030; BMEII0031; BMEII0032; BMEII0033; BMEII0034; BMEII0035; type IV secretion system                                                                                                                                                                                                                                                                                                                                                                                                                 |
| <i>Helicobacter</i>  | Adherence<br>Endotoxin<br><br>Enzyme<br>Molecular mimicry<br>Motility<br>Proinflammatory effect<br>Secretion system<br><br>Toxin<br>Type IV secretory protein<br>Pathogenicity islands | babA; babB; hopZ; sabA;<br>gluE; gluP; kdtB; lpxB; rfaC; rfaJ; rfbD; rfbM; wbcJ; wbpB;<br>ureA; ureB; ureE; ureF; ureG; ureH; ureI;<br>fucT; fucU; neuA; neuB;<br>flaA; flaB; flgG<br>napA; oipA;<br>cag1; cag10; cag11; cag12; cag13; cag14; cag15; cag16; cag17; cag18/cagL; cag19; cag2; cag20; cag21; cag22; cag23 (cagE/picB); cag24; cag25; cag3; cag4; cag5 (virD4); cag6; cag7; cag8; cag9; virB11; type IV secretion system.<br>vacA<br>cagA<br>cag-PAI                                                                                                                                                                                                                                                                                                                                                           |
| <i>Campylobacter</i> | Adherence<br><br>Invasion<br>Motility<br><br>Secretion system<br>Toxin                                                                                                                 | cadF; Cj1415c; Cj1416c; Cj1421c; Cj1422c; Cj1423c; Cj1425c; Cj1426c; Cj1427c; Cj1429c; Cj1430c; Cj1431c; Cj1432c; Cj1433c; Cj1434c; Cj1435c; Cj1436c; Cj1437c; Cj1438c; Cj1440c; Cj1442c; fcl; glf; gmhA2; kfiD; kpsC; kpsD; kpsE; kpsF; kpsM; kpsS; kpsT; Cj0983; Cj1135; Cj1136; Cj1137c; Cj1138; Cj1139c; Cj1140; Cj1144c; Cj1145c; gmhA; htrB; neuA1; neuB1; neuC1; waaC; waaD; waaE; waaF; waaV; porA; peb1A.<br>ciaB, ciaC (invasion antigens)<br>Cj0371; Cj1312; Cj1313; flaA; flaB; flaC; flaD; flaG; flgB; flgC; flgD; flgE; flgE2; flgG; flgG2; flgH; flgI; flgK; flhA; flhB; flhF; fliA; fliD; fliE; fliF; fliG; fliH; fliI; fliL; fliM; fliN; fliP; fliQ; fliR; fliS; fliY; motA; motB; pflA; ptmA; ptmB.<br>Cjp54; virB10; virB11; virB4; virB8; virB9; virD4; type IV secretion system.<br>cdtA; cdtB; cdtC; |

| <b>Genus</b>       | <b>Major Tested Virulence factors</b>                  | <b>Corresponding tested Genes or function</b>                                                                                                                                                                                                                                                                                                                                                                                                                                                              |
|--------------------|--------------------------------------------------------|------------------------------------------------------------------------------------------------------------------------------------------------------------------------------------------------------------------------------------------------------------------------------------------------------------------------------------------------------------------------------------------------------------------------------------------------------------------------------------------------------------|
| <i>Legionella</i>  | Adherence<br>Enzyme<br>Iron uptake<br>Motility         | htpB; omp28; pilB; pilC; pilD;<br>mip;<br>ccmC; iraAB; frgA; feoA; feoB;<br>flaA; flgA; flgB; flgC; flgD; flgE; flgF; flgG; flgH; flgI;<br>flgK; flgL; flhA; flhB; flhF; fliA; fliD; fliE; fliF; fliG;<br>fliH; fliJ; fliM; fliN; fliO; fliP; fliQ; fliR; fliS; motA;<br>motB;                                                                                                                                                                                                                             |
|                    | Nutrient acquisition<br>Regulation<br>Secretion system | phtA;<br>csrA; letA; letS; relA; rpoS;<br>lspD; lspE; lspF; lspG; lspH; lspI; lspJ; lspK; lspL;<br>lspM; pilD; (Type II secretion system). dotA; dotB;<br>dotC; dotD; icmB; icmC; icmD; icmE; icmF; icmG;<br>icmH; icmJ; icmK; icmL; icmM; icmN; icmO; icmP;<br>icmQ; icmR; icmS; icmT; icmV; icmW; icmX; lepA;<br>lepB; lidA; lvgA; ralF; sdeA/laiA; sdeB; sdeC; sdeD;<br>sidA; sidB; sidC; sidE; sidF; sidG; sidH; vipA; vipD;<br>vipE; vipF; wipA; wipB; wipC; ylfA; ylfB (type IV<br>secretion system) |
|                    | Stress protein<br>Toxin<br>Unclassified                | gspA (global stress gene) katA; katB; sodB; sodC;<br>RtxA<br>enhA; enhB; enhC; ligA;                                                                                                                                                                                                                                                                                                                                                                                                                       |
| <i>Pseudomonas</i> | Adherence                                              | fleN; fleQ; fleR; flgC; flgD; flgE; flgF; flgG; flgH; flgI;<br>flgJ; flgK; flgL; flhA; flhB; flhF; fliC; fliD; fliE; fliF;<br>fliG; fliH; fliI; fliJ; fliM; fliN; fliO; fliP; fliQ; fliR;<br>waaA; waaC; waaF; waaG; waaP; wzy; wzz; chpA;<br>chpB; chpC; chpD; chpE; fimT; fimU; fimV; pilA; pilB;<br>pilC; pilD; pilE; pilF; pilG; pilH; pilI; pilJ; pilK; pilM;<br>pilN; pilO; pilP; pilQ; pilR; pilS; pilT; pilU; pilV; pilW;<br>pilX; pilY1; pilY2;                                                   |
|                    | Antiphagocytosis                                       | Alg44; Alg8; algA; algB; algD; algE; algF; algG; algI;<br>algJ; algK; algL; algP; algQ; algR; algU; algX; algZ;<br>mucA; mucB; mucC;                                                                                                                                                                                                                                                                                                                                                                       |
|                    | Biosurfactant<br>Iron uptake                           | rhIA; rhIB;<br>fptA; pchA; pchB; pchC; pchD; pchE; pchF; pchG;<br>pchH; pchI; pchR; fpvA; pvdA; pvdD; pvdE; pvdS;                                                                                                                                                                                                                                                                                                                                                                                          |
|                    | Pigment<br>Protease<br>Regulation<br>Secretion system  | phzM; phzS (Pyocyanin)<br>aprA; lasA; lasB.<br>lasI; lasR; rhIL; rhIR;<br>xcpP; xcpQ; xcpR; xcpS; xcpT; xcpU; xcpV; xcpW;<br>xcpX; xcpY; xcpZ (Type II secretion system)                                                                                                                                                                                                                                                                                                                                   |
|                    | Toxin                                                  | toxA; exoS; exoT; exoU; exoY; plcH;                                                                                                                                                                                                                                                                                                                                                                                                                                                                        |
